# Supplementary material for: Observed Physical Function Is Associated With Better Cognition Among Elderly Adults: The Adventist Health Study-2
Source: PubMed Central journal article supplement — Am J Alzheimers Dis Other Demen. 2020 Sep 30;35:1533317520960868. doi: 10.1177/1533317520960868 (PMC10623938; doi:10.1177/1533317520960868), 2020-09-30
Supplement: Supplemental_Material.pdf [file Supplemental_Material.pdf]

## Supplemental Material

**Supplementary Table 1. Characteristics of study participants by vegetarian dietary pattern status at baseline**

| Characteristic                        | Mean $\pm$ SD or n (%)               |                                          |
|---------------------------------------|--------------------------------------|------------------------------------------|
|                                       | Vegetarian dietary pattern<br>(n=68) | Non-Vegetarian dietary pattern<br>(n=59) |
| Age, years                            | 76.0 $\pm$ 7.9<br>range 61-90        | 73.6 $\pm$ 7.8<br>range 60-92            |
| Sex                                   |                                      |                                          |
| Male                                  | 30 (44.1)                            | 24 (40.7)                                |
| Female                                | 38 (55.9)                            | 35 (59.3)                                |
| Race                                  |                                      |                                          |
| White                                 | 58 (85.3)                            | 43 (72.9)                                |
| Non-White                             | 10 (14.7)                            | 16 (27.1)                                |
| Education, years                      | 17.1 $\pm$ 2.4                       | 16.2 $\pm$ 2.7                           |
| MMSE                                  | 29.0 $\pm$ 1.3                       | 29.2 $\pm$ 1.0                           |
| MOCA                                  | 25.4 $\pm$ 3.3                       | 25.0 $\pm$ 3.0                           |
| GDS                                   | 3.7 $\pm$ 3.5                        | 2.3 $\pm$ 2.3                            |
| AMNART IQ                             | 118.6 $\pm$ 7.1                      | 118.7 $\pm$ 7.9                          |
| Mild memory impairment, yes           | 15 (22.1)                            | 10 (16.9)                                |
| BMI                                   | 26.3 $\pm$ 5.5                       | 28.0 $\pm$ 5.4                           |
| normal, underweight (BMI $\leq$ 24.9) | 35 (54.5)                            | 16 (27.1)                                |
| overweight (BMI 25-29.9)              | 20 (29.4)                            | 25 (42.4)                                |
| obese (BMI>30)                        | 13 (19.1)                            | 18 (30.5)                                |
| ApoE genotype*                        |                                      |                                          |
| 2/3                                   | 9 (14.7)                             | 5 (10.0)                                 |

|                                                                      |                       |                       |
|----------------------------------------------------------------------|-----------------------|-----------------------|
| 3/3                                                                  | 33 (54.1)             | 33 (66.0)             |
| 2/4, 3/4 or 4/4                                                      | 19 (31.2)             | 12 (24.0)             |
| PPT total (range)                                                    | 26.3 ± 4.4 (13-33)    | 26.9 ± 4.5 (16-34)    |
| TUG time (sec) (range)                                               | 10.5 ± 2.8 (6.7-22.4) | 10.4 ± 2.7 (5.3-17.4) |
| Vigorous activity, MET-hours per week<br>MET-hours per week (range)‡ | 9.8 ± 9.2 (0-31.8)    | 9.4 ± 9.8 (0-31.7)    |

†n=113

\*n=100

‡metabolic equivalents

**Supplementary Table 2. Results from unadjusted regression models of associations between**

| <b>Variable</b>                                             | Memory/Language<br>$\beta$ [SE ( $\beta$ )] <sup>*</sup> ; p-value | Mild Memory Impairment<br>OR (95% CI) <sup>†</sup> | Executive Function<br>$\beta$ [SE ( $\beta$ )] <sup>*</sup> ; p-value |
|-------------------------------------------------------------|--------------------------------------------------------------------|----------------------------------------------------|-----------------------------------------------------------------------|
| PPT total (per SD* score)                                   | 0.10 (0.09); p=0.27                                                | 1.01 (0.65, 1.55)                                  | 0.12 (0.08); p = 0.17                                                 |
| TUG time (per SD* sec)                                      | -0.07 (0.09); p=0.45                                               | 0.85 (0.53, 1.37)                                  | -0.10 (0.09); p = 0.23                                                |
| Vigorous activity (per SD* MET-hours per week) <sup>‡</sup> | -0.14 (0.09); p=0.13                                               | 1.28 (0.85, 1.95)                                  | -0.11 (0.09); p = 0.23                                                |

**measures of physical abilities and self-reported physical activity and cognition**

\*SD: standard deviation

<sup>†</sup>OR: Odds Ratio, 95% CI: confidence interval

<sup>‡</sup>metabolic equivalents
